# Supplementary material
Source: publisher figshare collection journal article supplement (https://karger.figshare.com/ndownloader/files/31530131)
Supplement: Supplementary file 1 [file 31530131]

|                                                      |                                                                                                                                                       |                                    |
|------------------------------------------------------|-------------------------------------------------------------------------------------------------------------------------------------------------------|------------------------------------|
|                                                      | assessing outcomes) and how                                                                                                                           | <u>5</u>                           |
|                                                      | 11b If relevant, description of the similarity of interventions                                                                                       | <u>6</u>                           |
| Statistical methods                                  | 12a Statistical methods used to compare groups for primary and secondary outcomes                                                                     | <u>7</u>                           |
|                                                      | 12b Methods for additional analyses, such as subgroup analyses and adjusted analyses                                                                  | <u>7</u>                           |
| <b>Results</b>                                       |                                                                                                                                                       |                                    |
| Participant flow (a diagram is strongly recommended) | 13a For each group, the numbers of participants who were randomly assigned, received intended treatment, and were analysed for the primary outcome    | <u>8</u> <u>Fig 1 - 16</u>         |
| Recruitment                                          | 13b For each group, losses and exclusions after randomisation, together with reasons                                                                  | <u>8</u> <u>Fig 1 - 16</u>         |
|                                                      | 14a Dates defining the periods of recruitment and follow-up                                                                                           | <u>5</u>                           |
|                                                      | 14b Why the trial ended or was stopped                                                                                                                | <u>5</u>                           |
| Baseline data                                        | 15 A table showing baseline demographic and clinical characteristics for each group                                                                   | <u>8</u> <u>Table 1 - 18 - 19</u>  |
| Numbers analysed                                     | 16 For each group, number of participants (denominator) included in each analysis and whether the analysis was by original assigned groups            | <u>8</u> <u>Fig 1 - 16</u>         |
|                                                      | 17a For each primary and secondary outcome, results for each group, and the estimated effect size and its precision (such as 95% confidence interval) | <u>8</u> <u>Table 2 - 21 - 22</u>  |
| Outcomes and estimation                              | 17b For binary outcomes, presentation of both absolute and relative effect sizes is recommended                                                       | <u>8 - 10</u> <u>Table 2 21-22</u> |
| Ancillary analyses                                   | 18 Results of any other analyses performed, including subgroup analyses and adjusted analyses, distinguishing pre-specified from exploratory          | <u>8</u>                           |
| Harms                                                | 19 All important harms or unintended effects in each group (for specific guidance see CONSORT for harms)                                              | <u>8-10</u>                        |
| <b>Discussion</b>                                    |                                                                                                                                                       |                                    |
| Limitations                                          | 20 Trial limitations, addressing sources of potential bias, imprecision, and, if relevant, multiplicity of analyses                                   | <u>12</u>                          |
| Generalisability                                     | 21 Generalisability (external validity, applicability) of the trial findings                                                                          | <u>12</u>                          |
| Interpretation                                       | 22 Interpretation consistent with results, balancing benefits and harms, and considering other relevant evidence                                      | <u>11 - 12</u>                     |
| <b>Other information</b>                             |                                                                                                                                                       |                                    |
| Registration                                         | 23 Registration number and name of trial registry                                                                                                     | <u>5</u>                           |
| Protocol                                             | 24 Where the full trial protocol can be accessed, if available                                                                                        | <u>5</u>                           |
| Funding                                              | 25 Sources of funding and other support (such as supply of drugs), role of funders                                                                    | <u>7</u>                           |

\*We strongly recommend reading this statement in conjunction with the CONSORT 2010 Explanation and Elaboration for important clarifications on all the items. If relevant, we also recommend reading CONSORT extensions for cluster randomised trials, non-inferiority and equivalence trials, non-pharmacological treatments, herbal interventions, and pragmatic trials. Additional extensions are forthcoming: for those and for up to date references relevant to this checklist, see [www.consort-statement.org](http://www.consort-statement.org).
